# Supplementary material
Source: PubMed Central journal article supplement (PMC7660417)
Supplement: mmc1.pdf [file mmc1.pdf]

**PATTER, Volume 1**

**Supplemental Information**

**A Searchable Database of Crystallization**

**Cocktails in the PDB: Analyzing**

**the Chemical Condition Space**

**Miranda L. Lynch, Max F. Dudek, and Sarah E.J. Bowman**

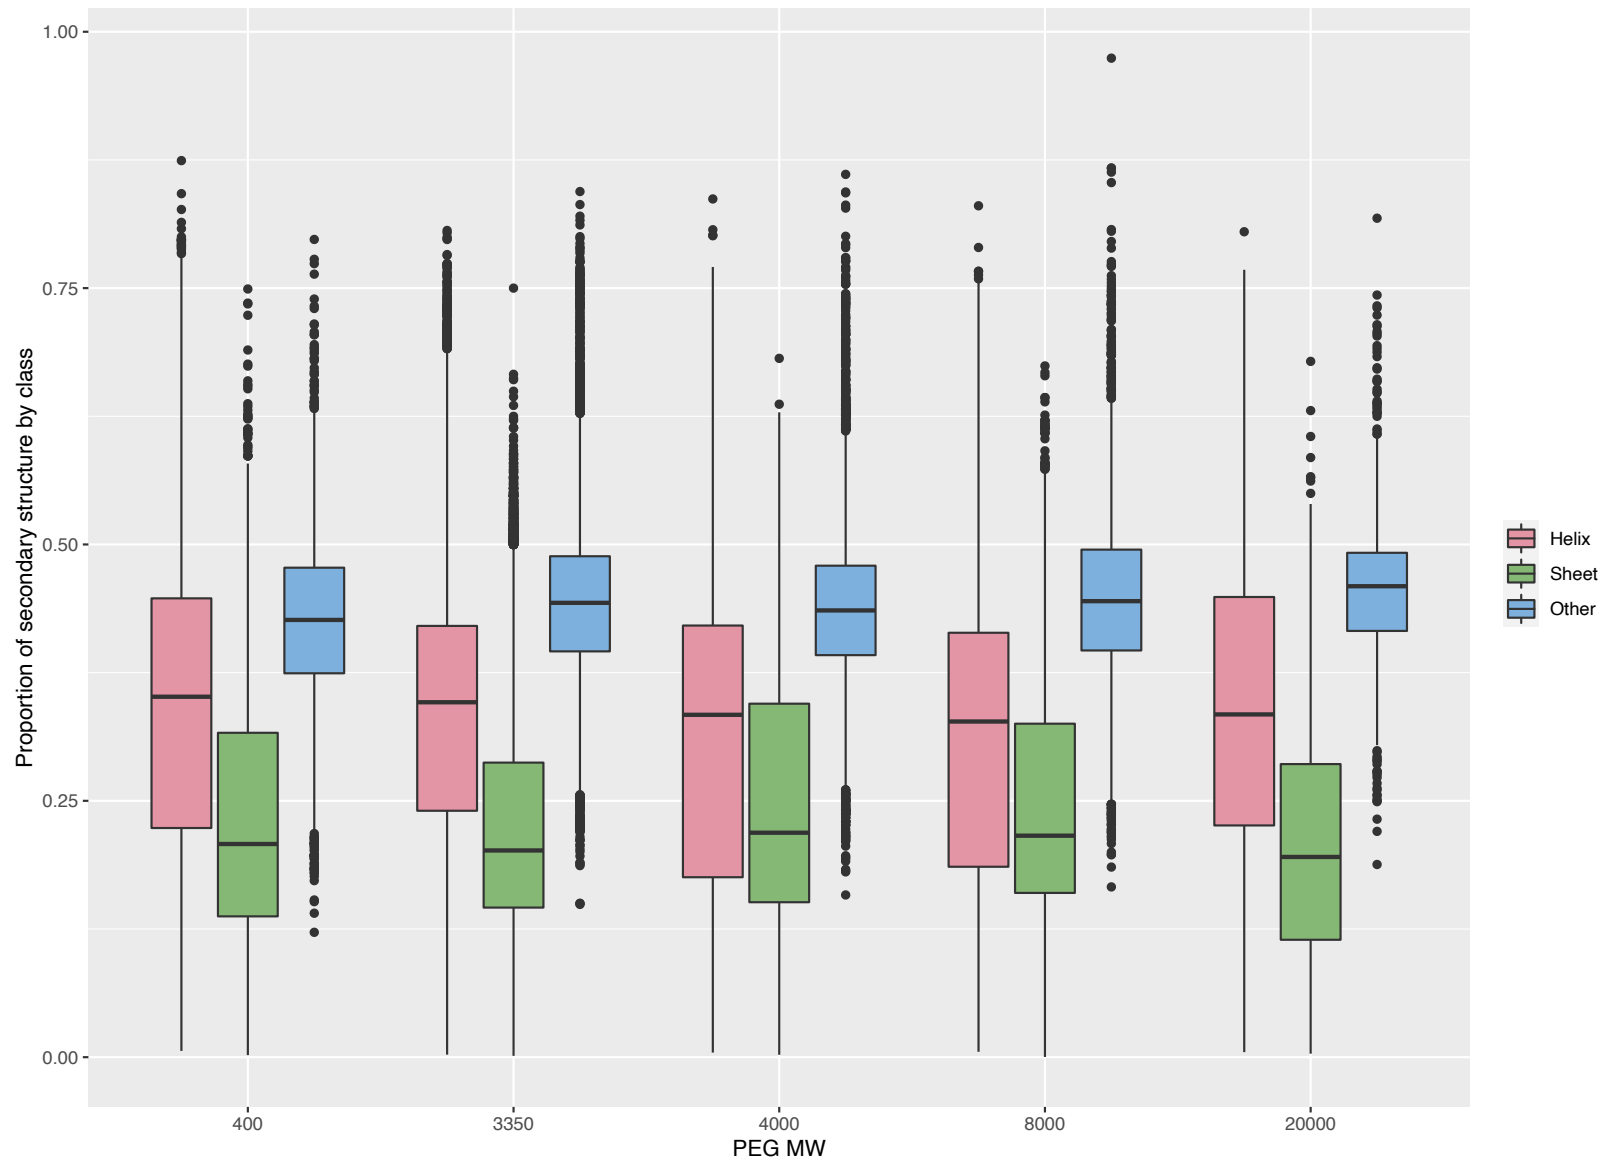

**Figure S1: Boxplots of proportions of secondary structural elements by class, for a subset of PEG MW.** The PEG MWs selected (PEG 400, 3350, 4000, 8000, and 20000) were chosen as these are common PEG cocktail components, and nearly span the full range of possible PEG values. Each PEG MW is associated with a trio of boxplots, one for each secondary structure element (which must sum to one for a given PDB ID). Each PEG MW is associated with a unique number of PDB IDs that used that PEG in the crystallization cocktail. Even in these box plots of a subset of PEG MW, the trends observed in the full model are visible, with decreasing *helix* content and increasing *other* proportion of secondary structure associated with increasing PEG MW.

| Crystallization Conditions                                                                                                                                                                                                                                                                                                                                                                                                                                                                                                                                                                                                                                                           | Details Extracted from PDB                                                                                                                                                                                                                                                                                                                                                                                                                                                                                                                    | Details Parsed                                                                                         | CDD |
|--------------------------------------------------------------------------------------------------------------------------------------------------------------------------------------------------------------------------------------------------------------------------------------------------------------------------------------------------------------------------------------------------------------------------------------------------------------------------------------------------------------------------------------------------------------------------------------------------------------------------------------------------------------------------------------|-----------------------------------------------------------------------------------------------------------------------------------------------------------------------------------------------------------------------------------------------------------------------------------------------------------------------------------------------------------------------------------------------------------------------------------------------------------------------------------------------------------------------------------------------|--------------------------------------------------------------------------------------------------------|-----|
| REMARK 280 CRYSTALLIZATION<br>CONDITIONS: PEG 3350, PH 8, VAPOR<br>DIFFUSION,<br>REMARK 280 HANGING DROP,<br>TEMPERATURE 290K                                                                                                                                                                                                                                                                                                                                                                                                                                                                                                                                                        | PEG 3350, pH 8, VAPOR DIFFUSION,<br>HANGING DROP, temperature 290K                                                                                                                                                                                                                                                                                                                                                                                                                                                                            | ['PEG 3350', None]                                                                                     | ✓   |
| REMARK 280 CRYSTALLIZATION CONDITIONS:<br>15 % W/V POLYETHYLENE GLYCOL PEG400,<br>REMARK 280 30 % W/V PEG 1500 AND 0.1 M<br>HEPES, PH 7.5, VAPOR DIFFUSION,<br>REMARK 280 SITTING DROP, TEMPERATURE<br>289K                                                                                                                                                                                                                                                                                                                                                                                                                                                                          | 15 % w/v polyethylene glycol<br>PEG400, 30 % w/v PEG 1500 and 0.1 M<br>Hepes, pH 7.5, VAPOR DIFFUSION,<br>SITTING DROP, temperature 289K                                                                                                                                                                                                                                                                                                                                                                                                      | ['PEG 400', '15%<br>w/v', 'PEG 1500',<br>'30% w/v', 'HEPES',<br>'100.0']                               | ✓   |
| REMARK 280 CRYSTALLIZATION CONDITIONS:<br>CONTAINERLESS BATCH METHOD: 300<br>REMARK 280 MICROL OF HIGH-DENSITY<br>SILICON OIL WAS TRANSFERRED INTO A<br>REMARK 280 WELL OF A CELL CULTURE PLATE<br>AND OVER-LAID WITH 500 MICROL<br>REMARK 280 OF REGULAR SILICON OIL. AT<br>THE INTERFACE BETWEEN THE TWO<br>REMARK 280 LIQUIDS A DROPLET WAS<br>DEPOSITED THAT WAS OBTAINED BY<br>REMARK 280 MIXING 0.4 MICROL OF H2O,<br>2.2 MICROL OF 5BETA-POR SOLUTION<br>REMARK 280 WITH NADP AND PROGESTERONE<br>ADDED AND 1.8 MICROL OF A<br>REMARK 280 CRYSTALLIZATION SOLUTION<br>CONSISTING OF 22.9 % MPD, 3.5 %<br>REMARK 280 PEG 8000, 0.05 M SODIUM<br>ACETATE, 0.02 M CACL2, PH 5.8. | CONTAINERLESS BATCH METHOD: 300<br>MICROL OF HIGH-DENSITY SILICON OIL<br>WAS TRANSFERRED INTO A WELL OF A<br>CELL CULTURE PLATE AND OVER-LAID<br>WITH 500 MICROL OF REGULAR SILICON<br>OIL. AT THE INTERFACE BETWEEN THE<br>TWO LIQUIDS A DROPLET WAS DEPOSITED<br>THAT WAS OBTAINED BY MIXING 0.4<br>MICROL OF H2O, 2.2 MICROL OF 5BETA-<br>POR SOLUTION WITH NADP AND<br>PROGESTERONE ADDED AND 1.8 MICROL<br>OF A CRYSTALLIZATION SOLUTION<br>CONSISTING OF 22.9 % MPD, 3.5 % PEG<br>8000, 0.05 M SODIUM ACETATE, 0.02 M<br>CACL2, PH 5.8. | ['MPD', '22.9%',<br>'PEG 8000', '3.5%',<br>'sodium acetate',<br>'50.0', 'calcium<br>chloride', '20.0'] | ✓   |
| REMARK 280 CRYSTALLIZATION<br>CONDITIONS: AMMONIUM SULPHATE,<br>POTASSIUM<br>REMARK 280 PHOSPHATE, POTASSIUM<br>CHLORIDE, PH 6.8, VAPOR DIFFUSION,<br>HANGING<br>REMARK 280 DROP, TEMPERATURE 277K                                                                                                                                                                                                                                                                                                                                                                                                                                                                                   | AMMONIUM SULPHATE, POTASSIUM<br>PHOSPHATE, POTASSIUM CHLORIDE, pH<br>6.8, VAPOR DIFFUSION, HANGING DROP,<br>temperature 277K                                                                                                                                                                                                                                                                                                                                                                                                                  | ['ammonium sulfate',<br>None, 'potassium<br>phosphate', None,<br>'potassium<br>chloride', None]        | ✓   |
| _exptl_crystal_grow.pdbx_details<br>'100 mM HEPES pH 7.5 and 80% 2-<br>Methyl-2,4-pentanediol (MPD)'                                                                                                                                                                                                                                                                                                                                                                                                                                                                                                                                                                                 | 100 mM HEPES pH 7.5 and 80% 2-<br>Methyl-2,4-pentanediol (MPD)                                                                                                                                                                                                                                                                                                                                                                                                                                                                                | ['HEPES', '100.0',<br>'MPD', '80%']                                                                    | ✓   |

**Table S1: Examples of successful parsing from the PDB Crystallization Conditions free text field to the CDD.** Data is extracted from the crystallization details free text field and the components are parsed using controlled vocabularies to generate the CDD. The detail parsing function extracts chemical names, even when concentration information is not present, as exemplified in the top and 4<sup>th</sup> row. Chemical concentrations are extracted when present and converted to mM units or specified as %v/v or %w/v. The detail parsing function is able to parse significant text present in the free text field, as shown in the 3<sup>rd</sup> row, and can fix spelling errors as shown in the 4<sup>th</sup> row. We note that the data extraction works with both the REMARK 280 (PDB format) and the exptl\_crystal\_grow.pdbx\_details (mmCIF file format) fields, as shown in the bottom row. These five PDB IDs are included in the 99,229 PDB IDs in the CDD.

| Crystallization Conditions                                                                                                                                                                                                                                                                                                                                   | Details Extracted from PDB                                                                                                                                                                                                              | Details Parsed                                                                                                                                                           | Parsing Issue                                                                                                                               |
|--------------------------------------------------------------------------------------------------------------------------------------------------------------------------------------------------------------------------------------------------------------------------------------------------------------------------------------------------------------|-----------------------------------------------------------------------------------------------------------------------------------------------------------------------------------------------------------------------------------------|--------------------------------------------------------------------------------------------------------------------------------------------------------------------------|---------------------------------------------------------------------------------------------------------------------------------------------|
| REMARK 280 CRYSTALLIZATION CONDITIONS:<br>NACL, MPD, PEG, PH 5.5, VAPOR<br>REMARK 280 DIFFUSION, HANGING DROP,<br>TEMPERATURE 298K                                                                                                                                                                                                                           | NaCl, MPD, PEG, pH 5.5,<br>VAPOR DIFFUSION, HANGING<br>DROP, temperature 298K                                                                                                                                                           | ['sodium chloride',<br>None, 'MPD', None,<br>'PEG ', None]                                                                                                               | Dictionary does not<br>recognize the word<br>'PEG' by itself                                                                                |
| REMARK 280 CRYSTALLIZATION CONDITIONS:<br>21-35% PEG 3350, 0.1 M BIS-TRIS PH 5.5<br>REMARK 280 -7.0 OR 21-40% MEDIUM-<br>MOLECULAR-WEIGHT PEG SMEARS (MMW PEG<br>REMARK 280 SMEARS) BUFFERED EITHER WITH<br>0.1 M BIS-TRIS PH 6.0-7.5 OR 0.1 M<br>REMARK 280 TRIS PH 7.5-8.8, VAPOR<br>REMARK 280 DIFFUSION, SITTING DROP, TEMPERATURE<br>REMARK 280 277.15K | 21-35% PEG 3350, 0.1 M<br>Bis-Tris pH 5.5-7.0 or 21-<br>40% medium-molecular-<br>weight PEG smears (MMW PEG<br>smears) buffered either<br>with 0.1 M Bis-Tris pH<br>6.0-7.5 or 0.1 M Tris pH<br>7.5-8.8                                 | ['PEG 3350',<br>'28.0%', 'medium-<br>molecular-weight',<br>'30.5%', 'PEG ',<br>'6.25%', 'smears mmw<br>PEG smears', None,<br>'bis-tris',<br>'100.0', 'tris',<br>'100.0'] | Details provided<br>are not specific<br>enough. The<br>dictionary does not<br>recognize the word<br>'or', nor does it<br>recognize 'smears' |
| REMARK 280 CRYSTALLIZATION CONDITIONS:<br>NULL, VAPOR DIFFUSION, SITTING DROP,<br>REMARK 280 TEMPERATURE 293K                                                                                                                                                                                                                                                | Null                                                                                                                                                                                                                                    | ['null', None]                                                                                                                                                           | No details provided                                                                                                                         |
| REMARK 280 CRYSTALLIZATION CONDITIONS:<br>THE PURIFIED PROTEIN WAS USED IN<br>REMARK 280 CRYSTALLISATION TRIALS<br>EMPLOYING BOTH, A STANDARD SCREEN WITH<br>REMARK 280 APPROXIMATELY 1200 DIFFERENT<br>CONDITIONS, AS WELL AS<br>REMARK 280 CRYSTALLISATION CONDITIONS<br>IDENTIFIED USING LITERATURE DATA.,<br>REMARK 280 BATCH MODE, TEMPERATURE 293K     | The purified protein was<br>used in crystallisation<br>trials employing both, a<br>standard screen with<br>approximately 1200<br>different conditions, as<br>well as crystallisation<br>conditions identified<br>using literature data. | ['trials<br>employing', None,<br>'standard', None,<br>'different',<br>'1200',<br>'identified', None,<br>'literature', None]                                              | No details are<br>provided, and the<br>dictionary does not<br>recognize any of<br>the words as<br>chemical<br>components                    |

**Table S2: Examples of unsuccessful parsing from the PDB Crystallization Conditions free text field.** The detail parsing function is unable to parse the details listed in the free text field in 34,508 PDB IDs, and these four PDB IDs provide examples of some of the myriad reasons why the details are not able to be automatically parsed.
